# Supplementary material for: Repurposing of Some Natural Product Isolates as SARS-COV-2 Main Protease Inhibitors via In Vitro Cell Free and Cell-Based Antiviral Assessments and Molecular Modeling Approaches
Source: PubMed Central journal article supplement (PMC8001104; doi:10.3390/ph14030213), 2021-03-04
Supplement: pharmaceuticals-14-00213-s001.pdf [file pharmaceuticals-14-00213-s001.pdf]

# Repurposing of Some Natural Product isolates as SARS-COV-2 Main Protease Inhibitors via In vitro Cell Free and cell based anti-viral Assessments and Molecular Modeling Approaches

Hossam M. Abdallah<sup>1,2,\*,#</sup>, Ali M. El-Halawany<sup>2,#</sup>, Alaa Sirwi<sup>1</sup>, Amr M. El-Araby<sup>3</sup>, Gamal A. Mohamed<sup>1,4</sup>, Sabrin R. M. Ibrahim<sup>5,6</sup>, Abdulrahman E. Koshak<sup>1</sup>, Hani Z. Asfour<sup>7</sup>, Zuhier A. Awan<sup>8</sup> and Mahmoud A. Elfaky<sup>1</sup>

## Supplementary Data

**Table S1.** The inactive natural isolates with high affinity to the viral protease (SARS-CoV-2 M<sup>PRO</sup>).

| No. | Compound Name                        | Structure                                                                            | Glide G-Score |
|-----|--------------------------------------|--------------------------------------------------------------------------------------|---------------|
| 9   | 1-Hydroxy-3,4-dihydronorharmine      | 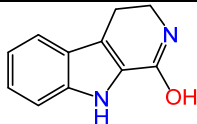   | -7.43         |
| 10  | Aromadendrin-8-C-β-D-glucopyranoside |  | -7.394        |
| 11  | Butyrolactone I                      |  | -7.316        |
| 12  | Terrenolide S                        |  | -7.304        |
| 13  | Ingenine C                           |  | -7.286        |

|    |                                       |                                                                                    |        |
|----|---------------------------------------|------------------------------------------------------------------------------------|--------|
| 14 | 1,3,6,7-Tetrahydroxy-8-prenylxanthone | 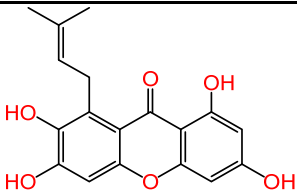 | -7.284 |
|----|---------------------------------------|------------------------------------------------------------------------------------|--------|

**Table S2.** Similar compounds to naringenin that searched for their activity against the viral protease (SARS-CoV-2 M<sup>PRO</sup>).

| No | Compound Name                 | Structure                                                                            | G-score |
|----|-------------------------------|--------------------------------------------------------------------------------------|---------|
| 1  | (+)-Eriodictyol               | 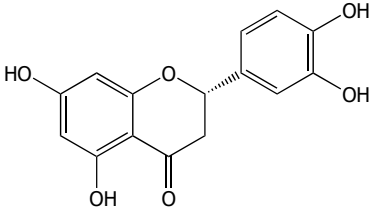   | -6.933  |
| 2  | (+)-Naringenin-5-methyl ether |  | -6.854  |
| 3  | Naringenin-6'-methyl ether    |  | -6.816  |
| 4  | (-) Aromadendrin              |  | -6.754  |
| 5  | (+)-6,8-dimethyl Naringenin   |  | -6.719  |

|    |                                   |                                                                                      |        |
|----|-----------------------------------|--------------------------------------------------------------------------------------|--------|
| 6  | (+)Naringenin-3'-methoxy          | 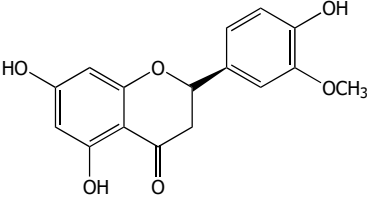   | -6.675 |
| 7  | Dihydromorin                      |    | -6.618 |
| 8  | (+) Naringenin-7-methyl ether     |   | -6.617 |
| 9  | (+)Naringenin-7,4'-dimethyl ether |  | -6.543 |
| 10 | Naringenin-4'-methyl ether        |  | -6.511 |
| 11 | (-)-Taxifolin                     |  | -6.494 |

---

12

(+)Eriodictyol-4'-  
methyl ether

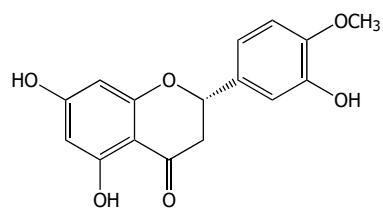

-5.783

---

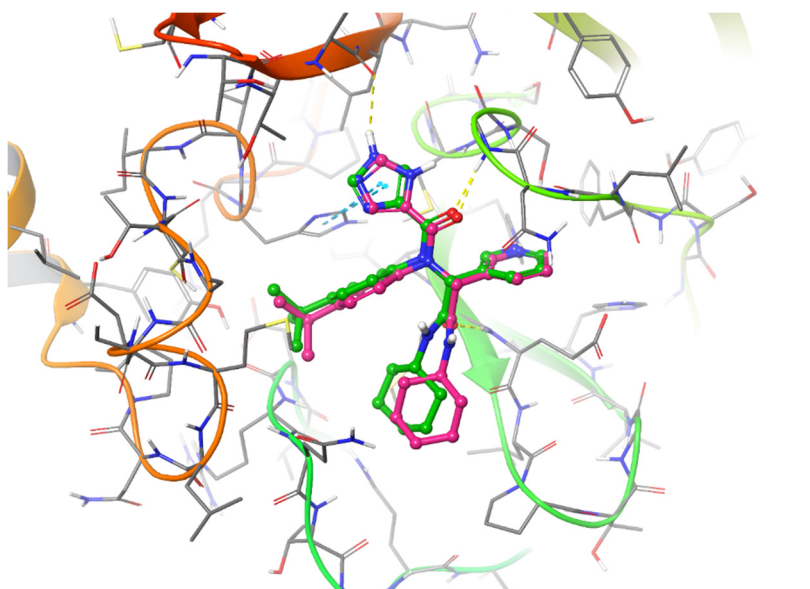

Figure S1. Superposition of the co-crystallized ligand (pink) and the redocked pose (green) with very small deviation and an RMSD value of 1.56 Å.

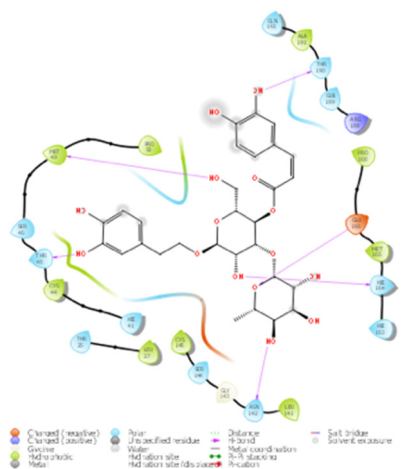

Acteoside

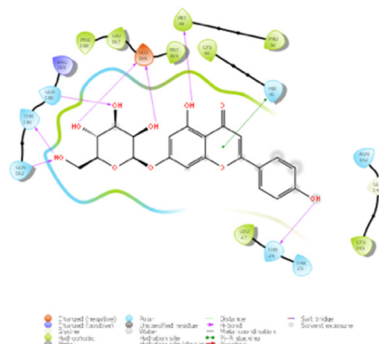

Apigenin-7-O- $\beta$ -D-glucoside

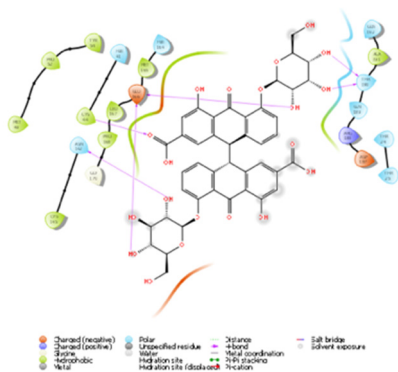

Sennoside B

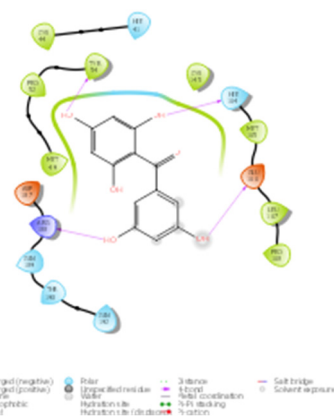

2,3',4,5',6-Pentahydroxy benzophenone

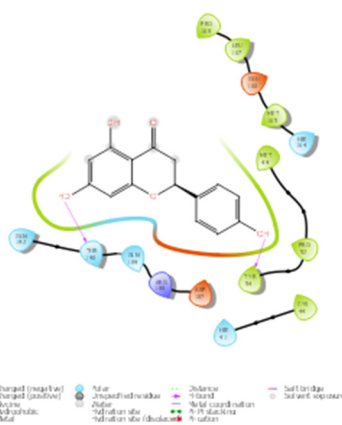

Naringenin

**Figure S2.** 2D Interaction diagrams of acteoside, apigenin-7-O-glucoside, sennoside B, 2,3',4,5',6-pentahydroxy benzophenone, and naringenin, respectively inside the Mpro active site in the crystal form.

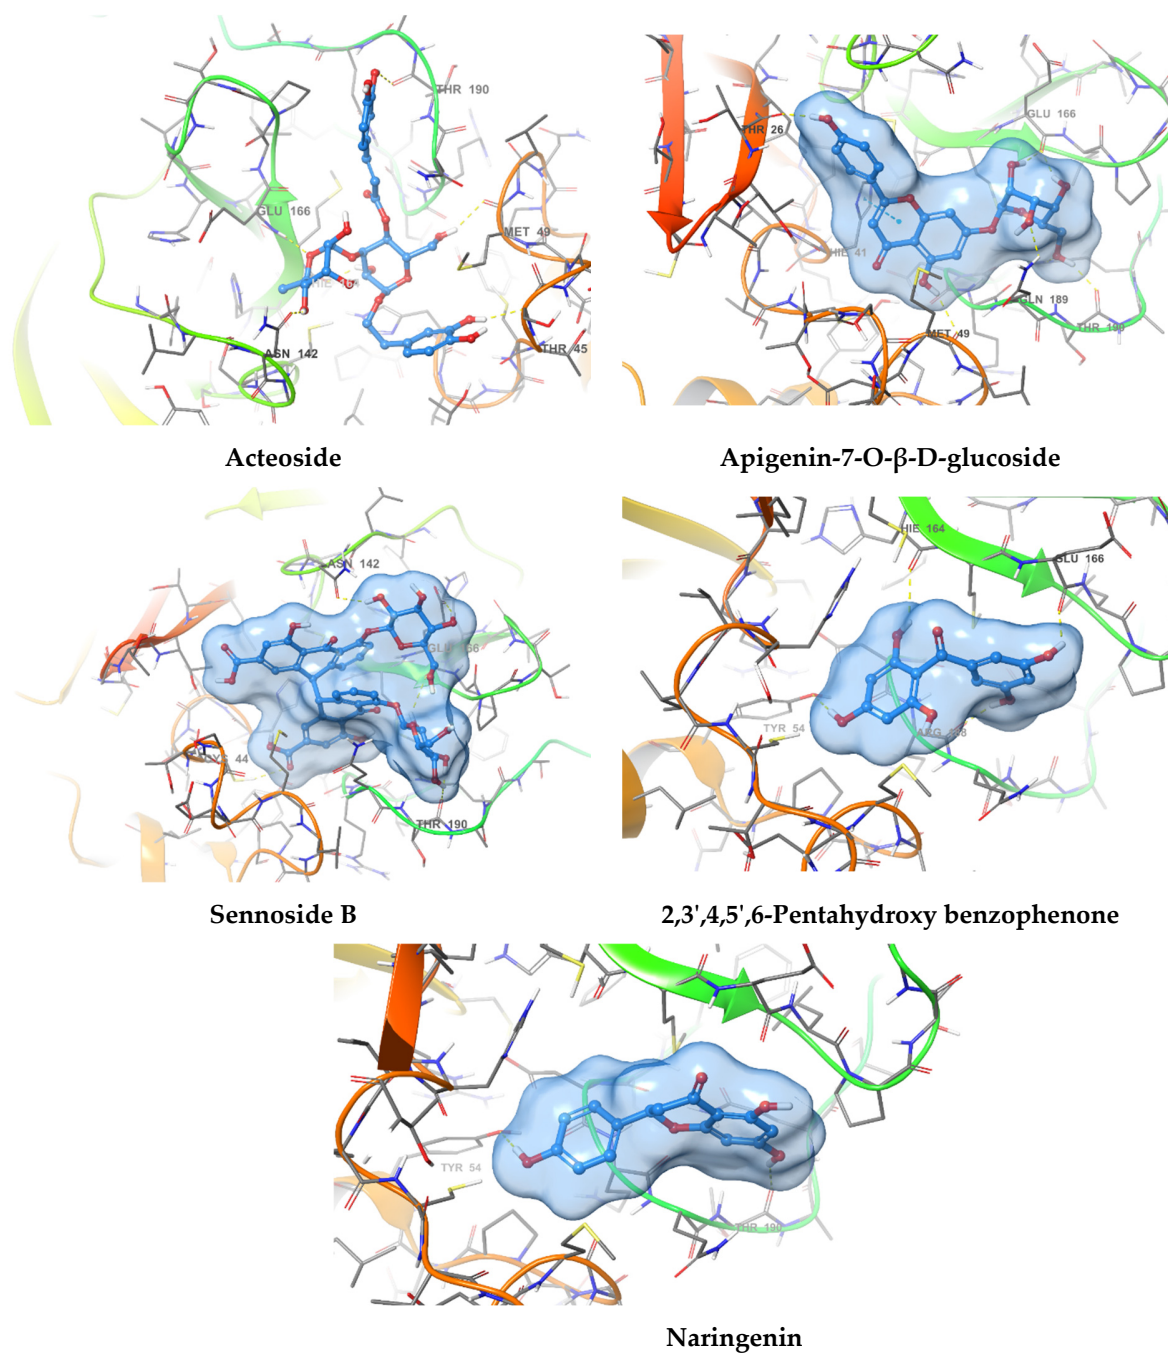

**Figure S3.** 3D Interaction diagrams of acteoside, apigenin, sennoside B, 2,3',4,5',6-pentahydroxy benzophenone, and naringenin, respectively.

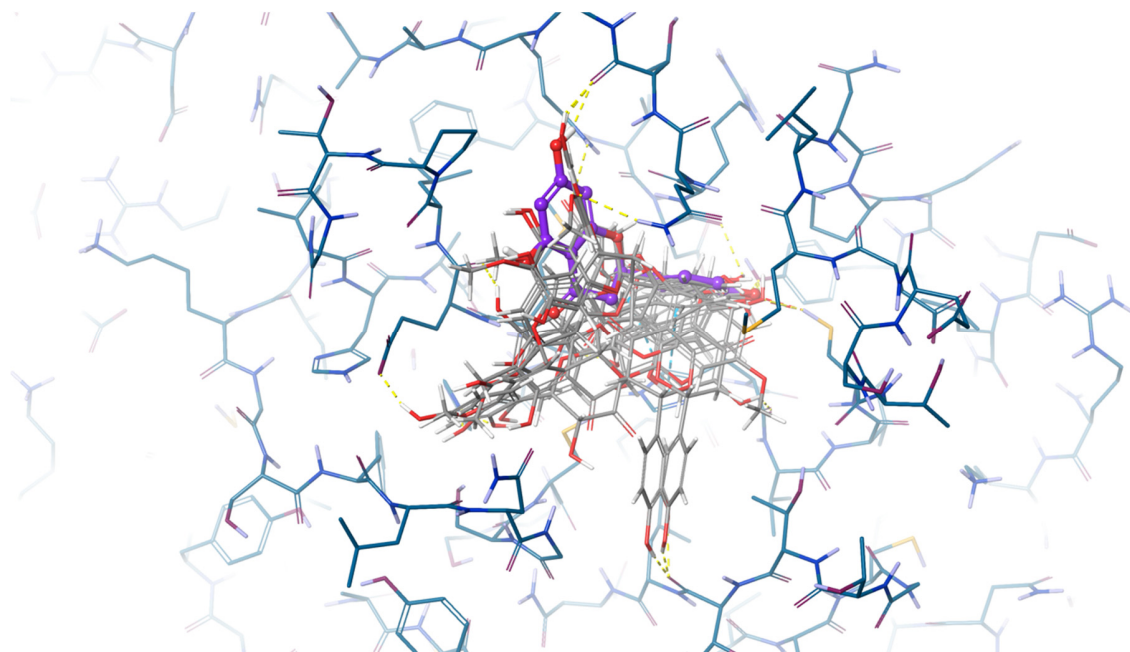

**Figure S4.** Overlay of naringenin analogues (grey) with naringenin (violet) in MPro active site
